# Supplementary material for: Mucosal SARS-CoV-2 vaccination of rodents elicits superior systemic T central memory function and cross-neutralising antibodies against variants of concern
Source: PubMed Central journal article supplement — eBioMedicine. 2023 Dec 18;99:104924. doi: 10.1016/j.ebiom.2023.104924 (PMC10772395; doi:10.1016/j.ebiom.2023.104924), 2023-12-18
Supplement: mmc1.pdf [file mmc1.pdf]

# Supplementary Figures

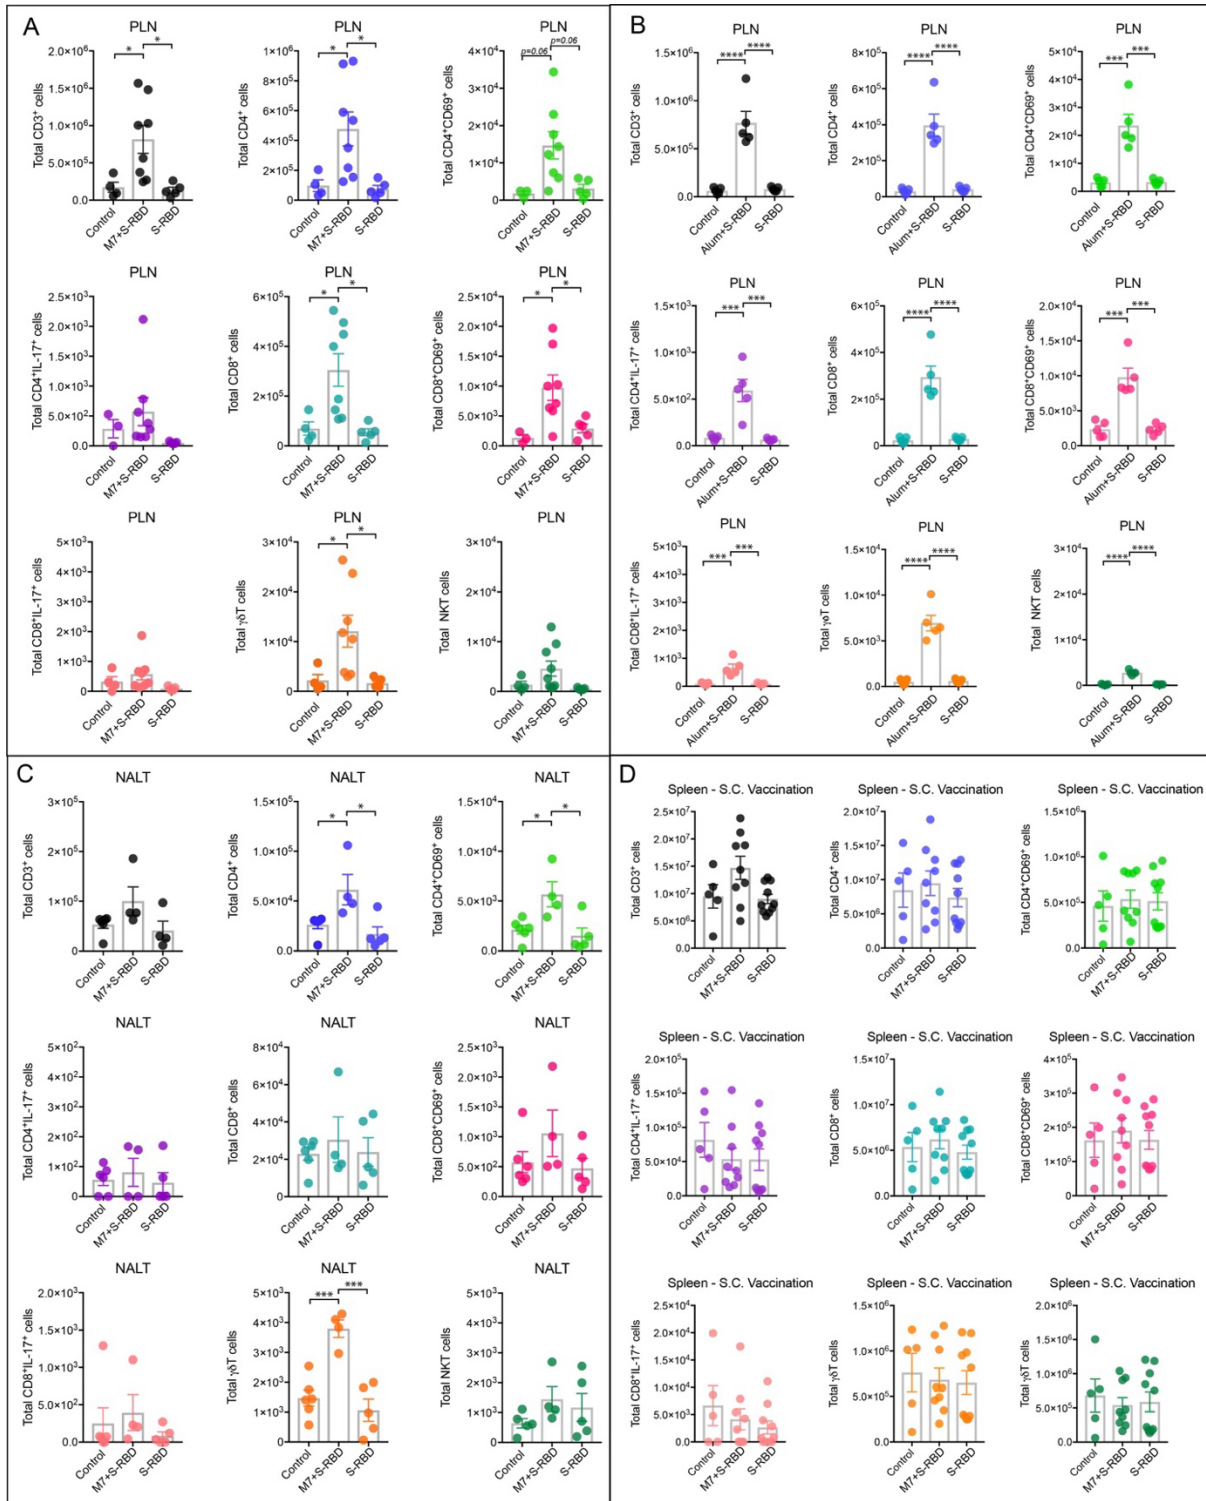

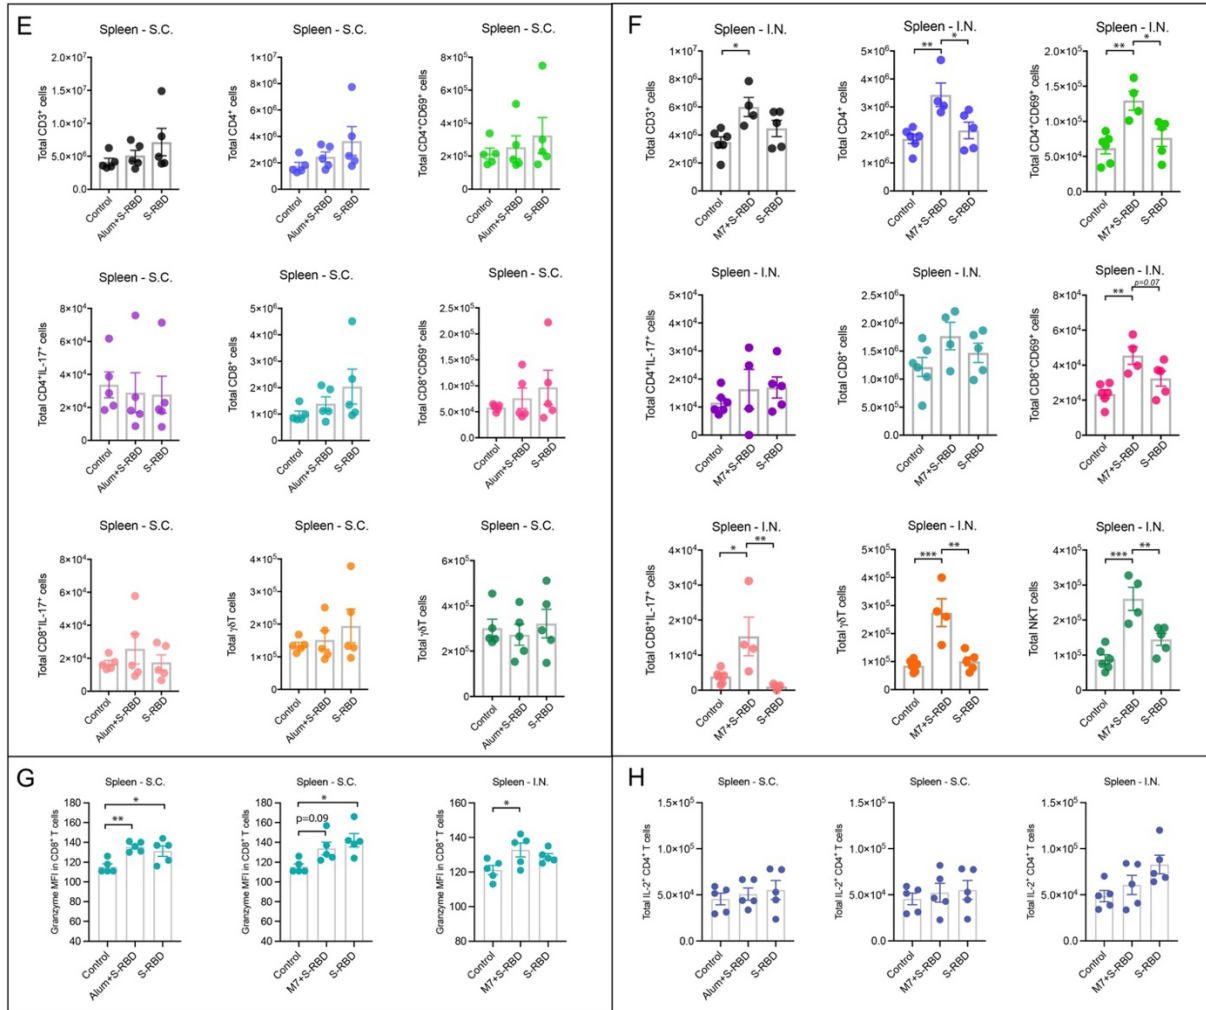

**Figure S1: Enhanced systemic T cell activation following mucosal vaccination**

(A-C) Plots showing the total numbers of various subsets of T cells day 5 following vaccination in the draining lymphoid tissue [either NALT or popliteal LN (PLN)] for the following groups: (A) M7+S-RBD S.C. (B) Alum+S-RBD (C) M7+S-RBD I.N. (D-F) Plots showing the total numbers of various subsets of T cells on day 5 following vaccination in the spleen for the following groups: (D) M7+S-RBD S.C. (E) Alum+S-RBD, and (F) M7+S-RBD I.N. (G) Mean fluorescence intensity (MFI) of Granzyme B expression in splenic CD8<sup>+</sup> T cells. (H) Plots showing the total numbers of IL-2-expressing CD4<sup>+</sup> T cells in the spleen. Groups were compared by 1-way ANOVA with Holm-Sidak's posttest; \* $p < 0.05$ ; \*\* $p < 0.01$ ; \*\*\* $p < 0.001$ ; \*\*\*\* $p < 0.0001$ . Corresponding cell frequencies are provided in **Table S3**.

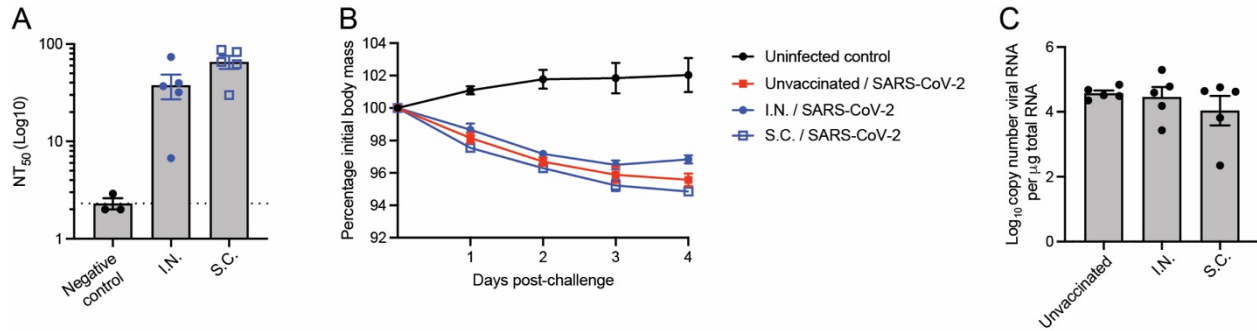

**Figure S2: Serological, clinical and virological outcomes following vaccination in the hamster model**

(A) Neutralizing antibodies were detected in all vaccinated hamsters, day 35 prior to challenge by plaque reduction neutralization test (PRNT). (B) Hamster weight was monitored following challenge and significantly declined in all SARS-CoV-2-challenged groups, by two-way ANOVA with Tukey's post-test, \*\*\*\* $p < 0.001$ . (C) No significant differences in viral genome quantification in the lungs were observed between groups day 4 post-infection by one-way ANOVA.

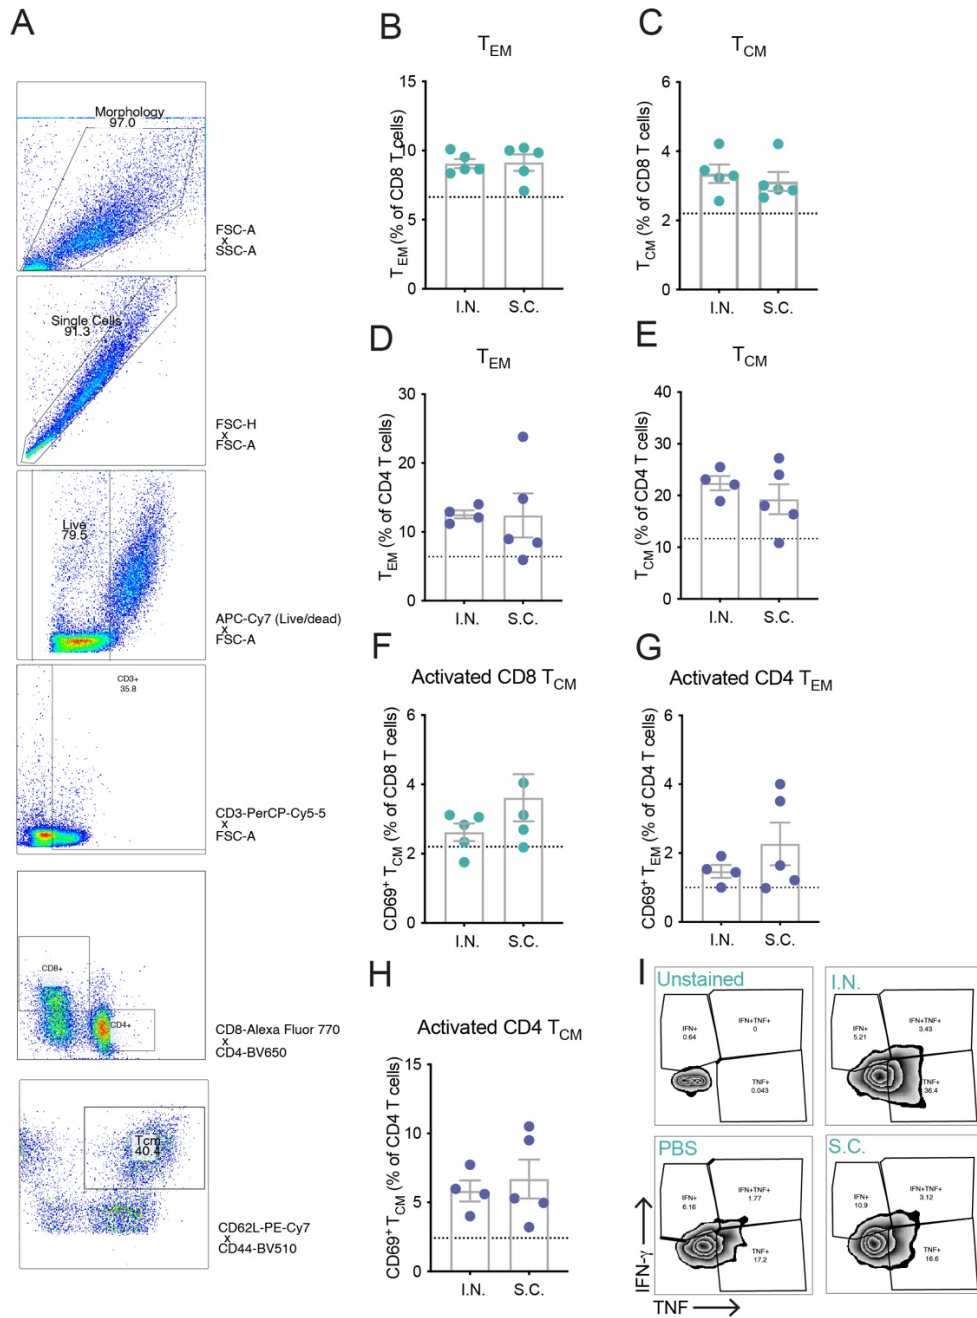

**Figure S3: Activation of several  $T_{MEM}$  subsets by ex vivo antigen stimulation**

(A) Gating strategy to identify memory T cell subsets in co-culture. Percentages of (B-C) CD8 memory and (D-E) CD4 memory subsets or (F) Activated CD8  $T_{CM}$  or activated (G-H) memory CD4 T cells, following S-RBD stimulation. All groups in B-H were compared by Student's unpaired t-test and found to not differ significantly. (I) Representative plots showing intracellular staining of  $T_{MEM}$  cells for IFN- $\gamma$  and TNF for unstained compensation controls (gated only with the morphology gate shown in panel A), and PBS, I.N. and S.C. groups.

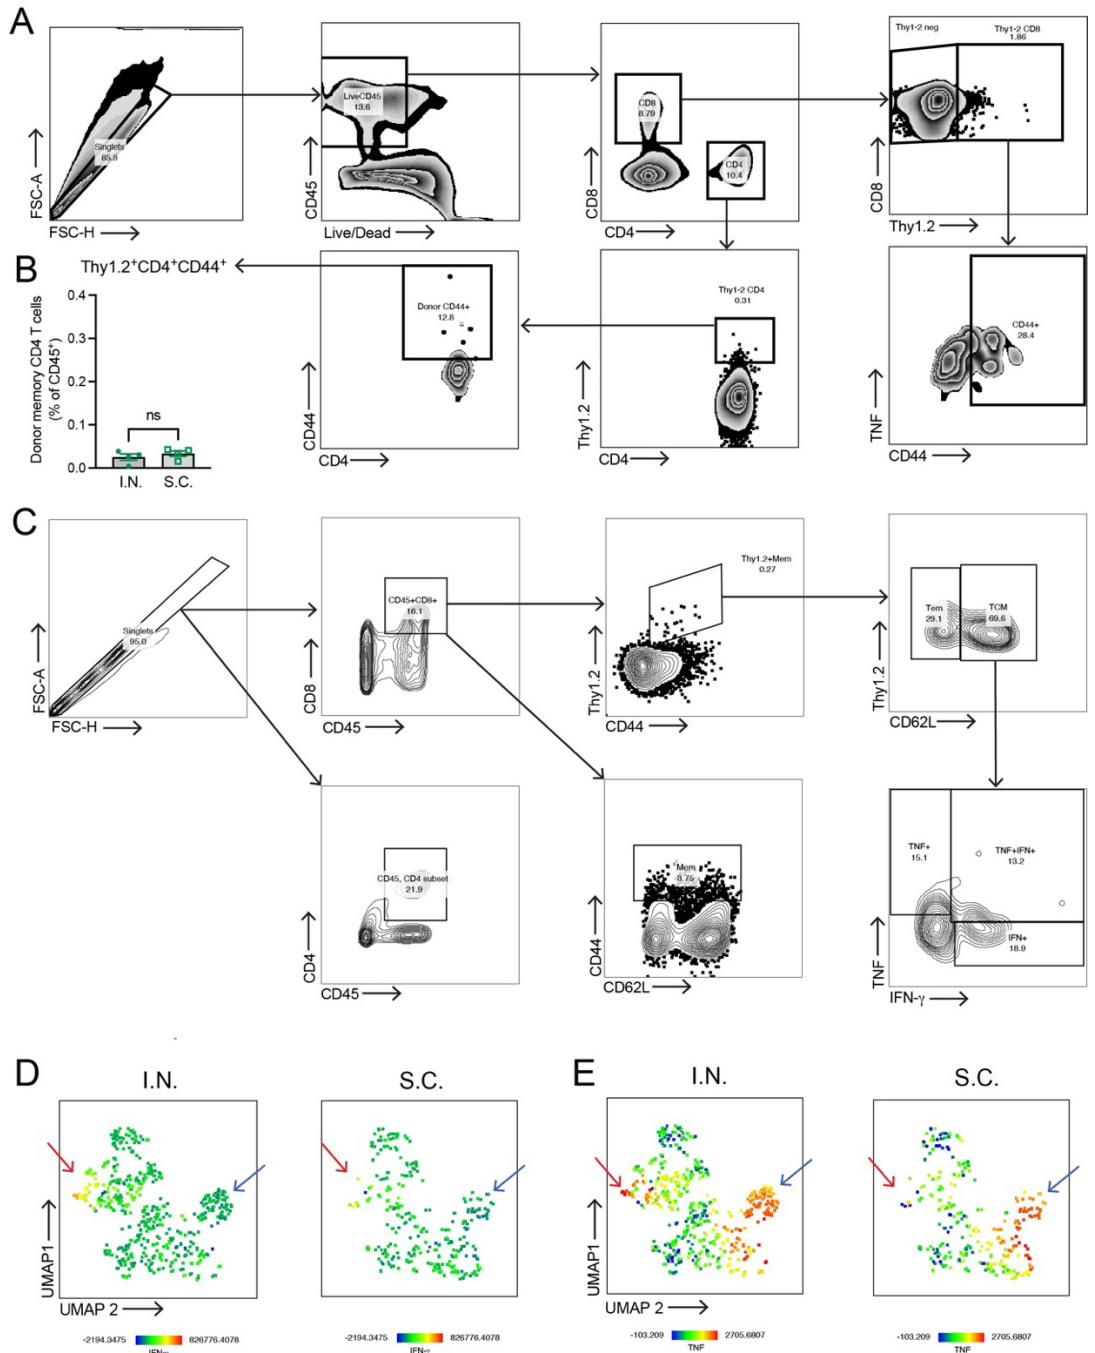

**Figure S4. Identification and characterisation of donor T cell phenotypes following *in vivo* antigen challenge**

(A) Flow cytometry gating strategies to identify donor Thy1.2<sup>+</sup> T cell populations in the lungs (B) Donor Thy1.2<sup>+</sup> CD4 T cells constituted a minor portion of hemopoietic cells in the lung following challenge and did not differ in frequency between I.N. or S.C. M7+S-RBD vaccinated groups.

(C) Flow cytometry gating strategies to identify donor Thy1.2<sup>+</sup> T cell populations in the brachial LNs. (D-E) Heat maps depicting (D) IFN- $\gamma$  and (E) TNF expression in T<sub>MEM</sub> cells of the brachial LNs. Areas with cytokine expressing CD4 T cells are indicated with red arrows and areas with cytokine expressing CD8 T cells are indicated by blue arrows.

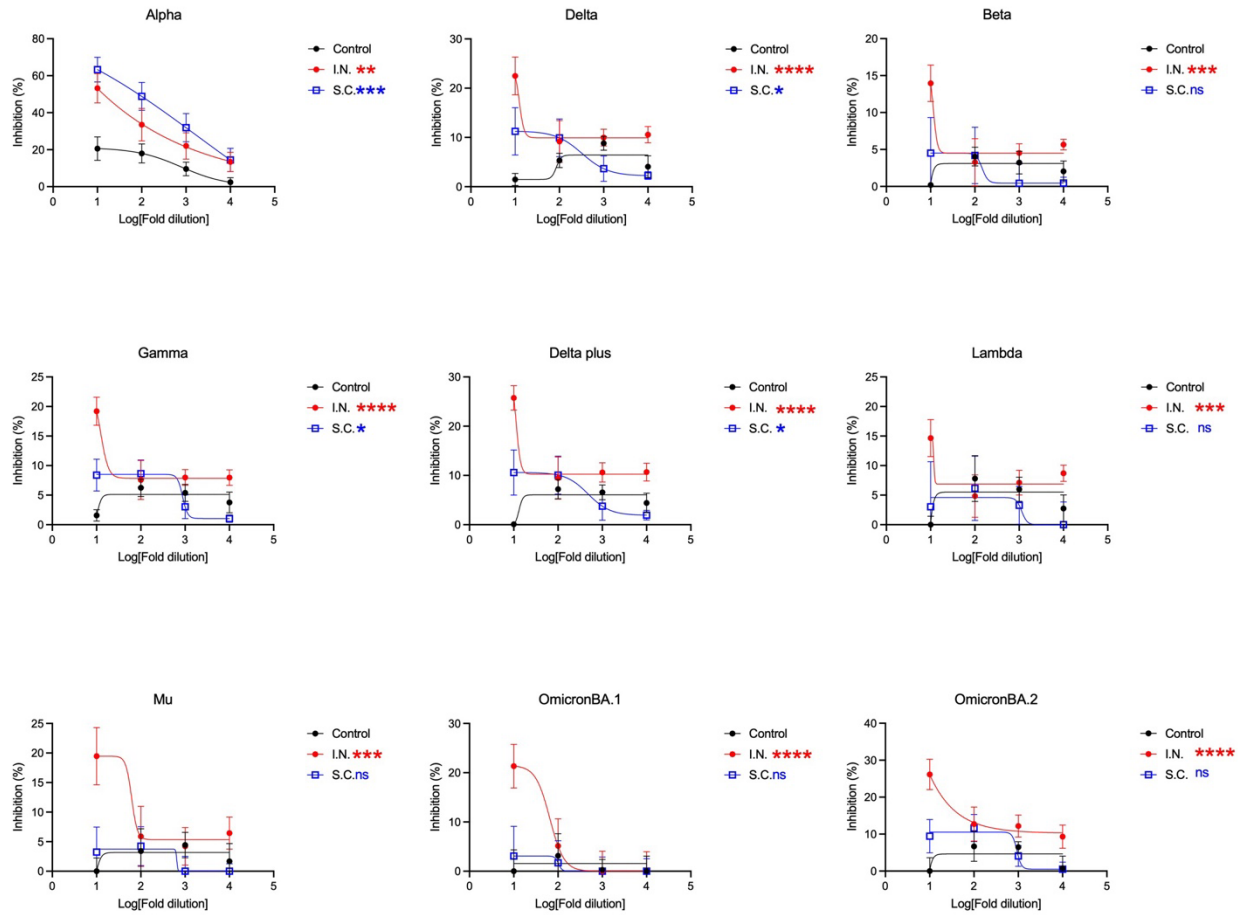

**Figure S5. Improved serum cross-neutralization of SARS-CoV-2 variants following mucosal immunisation.** Dose response curves showing the % inhibition against S-RBD from multiple SARS-CoV-2 variants by s-VNT assay. P-values were determined by 2-way ANOVA. \* $p < 0.05$ , \*\* $p < 0.01$ , \*\*\* $p < 0.001$  \*\*\*\* $p < 0.0001$  by two-way ANOVA.



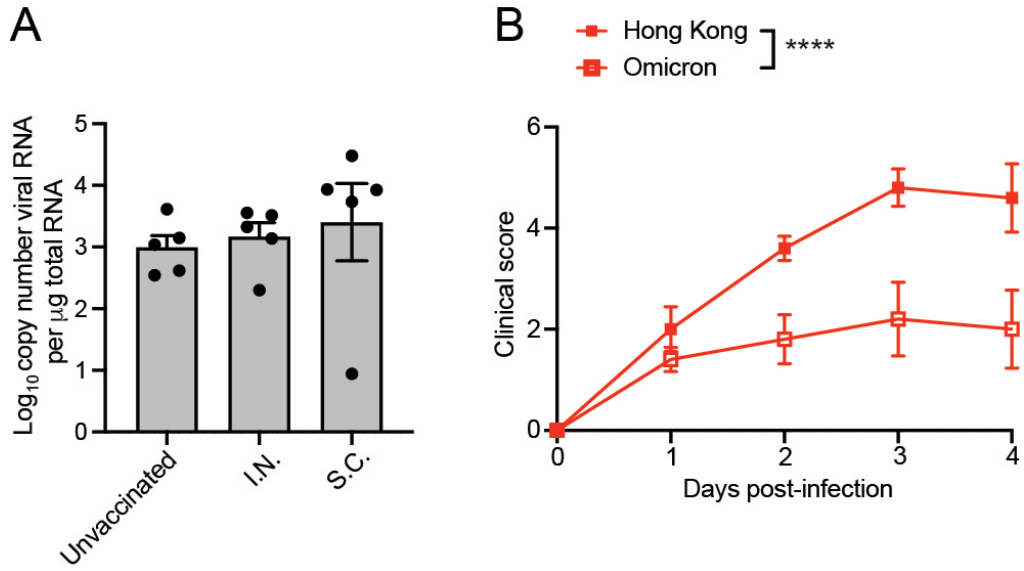

**Figure S6: Infection burden and clinical scores in Omicron-challenged hamsters vaccinated with parental strain S-RBD.**

(A) No significant differences in viral genome quantification were observed in lungs of Omicron challenged hamsters, by 1-way ANOVA. (B) Significantly reduced clinical scores for Omicron-infected hamsters compared to Hong Kong (parental strain)-infected hamsters by two-way ANOVA,  $p < 0.0001$ .



## Supplementary Tables

**Table S1: Predicted mouse MHC-I-binding peptides in the RBD of S-protein**

Peptide predictions for binding to the MHC-I molecules found in C57Bl/6 mice (H-2-Db, H-2-Dd, H-2-Kb and H-2-Kd) for the RBD domain of S-protein (Accession # QHD43416) were performed using TepiTool(1) and the top 2% of predicted binders based on percentile rank are presented.

| Peptide start | Peptide end | Peptide     | IEDB consensus percentile rank | Allele |
|---------------|-------------|-------------|--------------------------------|--------|
| 126           | 134         | KVGGNYNYL   | 0.09                           | H-2-Db |
| 48            | 56          | SVLYNSASF   | 0.1                            | H-2-Db |
| 187           | 195         | YQPYRVVVL   | 0.17                           | H-2-Db |
| 47            | 56          | YSVLYNSASF  | 0.17                           | H-2-Db |
| 7             | 17          | SIVRFPNITNL | 0.17                           | H-2-Db |
| 9             | 17          | VRFPNITNL   | 0.25                           | H-2-Db |
| 159           | 168         | STPCNGVEGF  | 0.3                            | H-2-Db |
| 64            | 72          | VSPTKLNDL   | 0.33                           | H-2-Db |
| 125           | 134         | SKVGGNYNYL  | 0.37                           | H-2-Db |
| 8             | 17          | IVRFPNITNL  | 0.38                           | H-2-Db |
| 179           | 187         | FQPTNGVGY   | 0.58                           | H-2-Db |
| 191           | 199         | RVVLSFEL    | 0.65                           | H-2-Db |
| 192           | 200         | VVLSFELL    | 0.68                           | H-2-Db |
| 90            | 100         | RQIAPGQTGKI | 0.69                           | H-2-Db |
| 207           | 215         | CGPKKSTNL   | 0.72                           | H-2-Db |
| 115           | 123         | VIAWNSNNL   | 0.78                           | H-2-Db |
| 127           | 134         | VGGNYNYL    | 1.1                            | H-2-Db |
| 64            | 72          | VSPTKLNDL   | 0.01                           | H-2-Dd |
| 207           | 215         | CGPKKSTNL   | 0.01                           | H-2-Dd |
| 206           | 215         | VCGPKKSTNL  | 0.02                           | H-2-Dd |
| 187           | 195         | YQPYRVVVL   | 0.04                           | H-2-Dd |
| 205           | 215         | TVCGPKKSTNL | 0.05                           | H-2-Dd |
| 185           | 195         | VGYPYRVVVL  | 0.07                           | H-2-Dd |
| 92            | 100         | IAPGQTGKI   | 0.13                           | H-2-Dd |
| 208           | 215         | GPKKSTNL    | 0.2                            | H-2-Dd |
| 185           | 193         | VGYPYRVV    | 0.2                            | H-2-Dd |
| 51            | 59          | YNSASFSTF   | 0.25                           | H-2-Dd |
| 9             | 17          | VRFPNITNL   | 0.29                           | H-2-Dd |
| 64            | 74          | VSPTKLNDLCF | 0.3                            | H-2-Dd |
| 2             | 11          | VQPTESIVRF  | 0.43                           | H-2-Dd |
| 10            | 17          | RFPNITNL    | 0.46                           | H-2-Dd |
| 6             | 14          | ESIVRFPNI   | 0.49                           | H-2-Dd |
| 185           | 192         | VGYPYRV     | 0.51                           | H-2-Dd |

|     |     |              |      |        |
|-----|-----|--------------|------|--------|
| 62  | 72  | YGVSP TKLNDL | 0.58 | H-2-Dd |
| 129 | 137 | GN YNYLYRL   | 0.01 | H-2-Kb |
| 7   | 14  | SIVRFPNI     | 0.01 | H-2-Kb |
| 193 | 200 | VVLSFELL     | 0.01 | H-2-Kb |
| 131 | 138 | YNYLYRLF     | 0.03 | H-2-Kb |
| 185 | 192 | VGYPYRV      | 0.04 | H-2-Kb |
| 185 | 193 | VGYPYRVV     | 0.06 | H-2-Kb |
| 9   | 17  | VRFPNITNL    | 0.07 | H-2-Kb |
| 116 | 123 | IAWNSNL      | 0.1  | H-2-Kb |
| 192 | 200 | VVLSFELL     | 0.14 | H-2-Kb |
| 24  | 32  | FNATRFASV    | 0.15 | H-2-Kb |
| 49  | 56  | VLYNSASF     | 0.2  | H-2-Kb |
| 192 | 199 | VVLSFEL      | 0.2  | H-2-Kb |
| 64  | 72  | VSPTKLNDL    | 0.2  | H-2-Kb |
| 127 | 137 | VGGNYNYLYRL  | 0.2  | H-2-Kb |
| 130 | 137 | NYNYLYRL     | 0.21 | H-2-Kb |
| 136 | 143 | RLFRKSNL     | 0.21 | H-2-Kb |
| 127 | 134 | VGGNYNYL     | 0.25 | H-2-Kb |
| 186 | 194 | GYQPYRVVV    | 0.05 | H-2-Kd |
| 61  | 69  | CYGVSP TKL   | 0.08 | H-2-Kd |
| 32  | 40  | VYAWNRKRI    | 0.11 | H-2-Kd |
| 176 | 185 | SYGFQPTNGV   | 0.19 | H-2-Kd |
| 9   | 17  | VRFPNITNL    | 0.26 | H-2-Kd |
| 77  | 84  | VYADSFVI     | 0.26 | H-2-Kd |
| 186 | 195 | GYQPYRVVVL   | 0.27 | H-2-Kd |
| 10  | 17  | RFPNITNL     | 0.3  | H-2-Kd |
| 60  | 69  | KCYGVSP TKL  | 0.44 | H-2-Kd |
| 59  | 69  | FKCYGVSP TKL | 0.52 | H-2-Kd |
| 187 | 195 | YQPYRVVVL    | 0.56 | H-2-Kd |
| 81  | 89  | SFVIRGDEV    | 0.61 | H-2-Kd |
| 50  | 59  | LYNSASFSTF   | 0.68 | H-2-Kd |
| 186 | 193 | GYQPYRVV     | 0.7  | H-2-Kd |
| 185 | 194 | VGYPYRVVV    | 0.74 | H-2-Kd |
| 154 | 162 | IYQAGSTPC    | 0.78 | H-2-Kd |
| 31  | 40  | SVYAWNRKRI   | 0.86 | H-2-Kd |

**Table S2: Predicted mouse MHC-II-binding peptides in the RBD of S-protein**

Peptide predictions for binding to the MHC-II molecule found in C57Bl/6 mice (H2-IAb) were performed using TepiTool(1).

| Peptide start | Peptide end | Peptide sequence | Consensus percentile rank | Allele |
|---------------|-------------|------------------|---------------------------|--------|
| 194           | 208         | VLSFELLHAPATVCG  | 2.9                       | H2-IAb |
| 151           | 165         | STEIYQAGSTPCNGV  | 3.7                       | H2-IAb |
| 45            | 59          | ADYSVLYNSASFSTF  | 5.5                       | H2-IAb |
| 56            | 70          | FSTFKCYGVSPTKLN  | 6.45                      | H2-IAb |
| 27            | 41          | TRFASVYAWNRKRIS  | 7.45                      | H2-IAb |
| 173           | 187         | PLQSYGFQPTNGVGY  | 7.55                      | H2-IAb |

**Table S3: Cell frequencies corresponding to Figure 1.**

Table values are provided as mean  $\pm$  SD and were compared by 2-way ANOVA with Tukey's posttest. \* $p < 0.05$ ; \*\* $p < 0.01$ ; \*\*\*\* $p < 0.0001$ . Nonsignificant p-values below 0.1 are provided.

|                                                              | Vaccine composition |                  |                 | p-value |
|--------------------------------------------------------------|---------------------|------------------|-----------------|---------|
|                                                              | Control             | Adjuvant+S-RBD   | S-RBD           |         |
| <b>Alum S.C. PLN</b>                                         |                     |                  |                 |         |
| CD4 (% of CD3 <sup>+</sup> )                                 | 51.6 $\pm$ 0.5      | 48.9 $\pm$ 3.1   | 50.9 $\pm$ 2.9  |         |
| CD4 <sup>+</sup> CD69 <sup>+</sup> (% of CD3 <sup>+</sup> )  | 6.0 $\pm$ 1.0       | 11.1 $\pm$ 2.3   | 8.9 $\pm$ 9.0   | *       |
| CD8 <sup>+</sup> (% of CD3 <sup>+</sup> )                    | 38.0 $\pm$ 1.1      | 37.6 $\pm$ 2.2   | 37.4 $\pm$ 1.4  |         |
| CD8 <sup>+</sup> CD69 <sup>+</sup> (% of CD3 <sup>+</sup> )  | 3.4 $\pm$ 0.6       | 10.6 $\pm$ 2.5   | 8.3 $\pm$ 2.7   | *       |
| CD4 <sup>+</sup> IL-17 <sup>+</sup> (% of CD4 <sup>+</sup> ) | 0.15 $\pm$ 0.04     | 0.34 $\pm$ 0.19  | 0.17 $\pm$ 0.05 |         |
| CD8 <sup>+</sup> IL-17 <sup>+</sup> (% of CD8 <sup>+</sup> ) | 0.22 $\pm$ 0.02     | 0.43 $\pm$ 0.11  | 0.31 $\pm$ 0.08 |         |
| gdT cell (% of CD3 <sup>+</sup> )                            | 0.92 $\pm$ 0.07     | 0.80 $\pm$ 0.079 | 0.76 $\pm$ 0.11 |         |
| NKT cell (% of CD3 <sup>+</sup> )                            | 0.38 $\pm$ 0.069    | 0.27 $\pm$ 0.066 | 0.25 $\pm$ 0.07 |         |
| <b>Alum S.C. Spleen</b>                                      |                     |                  |                 |         |
| CD4 (% of CD3 <sup>+</sup> )                                 | 48.2 $\pm$ 3.6      | 42.0 $\pm$ 2.2   | 50.6 $\pm$ 4.2  | ****    |
| CD4 <sup>+</sup> CD69 <sup>+</sup> (% of CD3 <sup>+</sup> )  | 10.0 $\pm$ 3.1      | 12.3 $\pm$ 1.5   | 9.0 $\pm$ 2.4   | *       |
| CD8 <sup>+</sup> (% of CD3 <sup>+</sup> )                    | 26.8 $\pm$ 2.6      | 23.9 $\pm$ 1.2   | 27.6 $\pm$ 2.3  | *       |
| CD8 <sup>+</sup> CD69 <sup>+</sup> (% of CD3 <sup>+</sup> )  | 5.3 $\pm$ 1.4       | 6.1 $\pm$ 1.5    | 4.8 $\pm$ 1.3   |         |
| CD4 <sup>+</sup> IL-17 <sup>+</sup> (% of CD4 <sup>+</sup> ) | 1.08 $\pm$ 0.68     | 1.85 $\pm$ 0.46  | 0.75 $\pm$ 0.37 |         |
| CD8 <sup>+</sup> IL-17 <sup>+</sup> (% of CD8 <sup>+</sup> ) | 1.68 $\pm$ 0.7      | 1.79 $\pm$ 0.58  | 0.93 $\pm$ 0.35 |         |
| gdT cell (% of CD3 <sup>+</sup> )                            | 2.94 $\pm$ 0.32     | 3.34 $\pm$ 0.44  | 2.78 $\pm$ 0.35 |         |
| NKT cell (% of CD3 <sup>+</sup> )                            | 5.42 $\pm$ 1.23     | 7.31 $\pm$ 0.99  | 4.94 $\pm$ 1.52 |         |
| <b>M7 S.C. PLN</b>                                           |                     |                  |                 |         |
| CD4 (% of CD3 <sup>+</sup> )                                 | 52.2 $\pm$ 4.8      | 58.4 $\pm$ 0.6   | 51.1 $\pm$ 2.5  | ****    |
| CD4 <sup>+</sup> CD69 <sup>+</sup> (% of CD3 <sup>+</sup> )  | 3.0 $\pm$ 0.3       | 3.4 $\pm$ 0.5    | 2.5 $\pm$ 0.3   |         |
| CD8 <sup>+</sup> (% of CD3 <sup>+</sup> )                    | 43.1 $\pm$ 4.2      | 36.9 $\pm$ 0.6   | 43.9 $\pm$ 2.6  | ****    |
| CD8 <sup>+</sup> CD69 <sup>+</sup> (% of CD3 <sup>+</sup> )  | 1.8 $\pm$ 0.6       | 1.3 $\pm$ 0.2    | 1.5 $\pm$ 0.3   |         |
| CD4 <sup>+</sup> IL-17 <sup>+</sup> (% of CD4 <sup>+</sup> ) | 0.14 $\pm$ 0.06     | 0.13 $\pm$ 0.04  | 0.13 $\pm$ 0.05 |         |
| CD8 <sup>+</sup> IL-17 <sup>+</sup> (% of CD8 <sup>+</sup> ) | 0.16 $\pm$ 0.1      | 0.07 $\pm$ 0.3   | 0.14 $\pm$ 0.09 |         |
| gdT cell (% of CD3 <sup>+</sup> )                            | 1.27 $\pm$ 0.11     | 1.29 $\pm$ 0.19  | 1.35 $\pm$ 0.20 |         |
| NKT cell (% of CD3 <sup>+</sup> )                            | 0.16 $\pm$ 0.05     | 0.18 $\pm$ 0.03  | 0.26 $\pm$ 0.12 |         |
| <b>M7 S.C. Spleen</b>                                        |                     |                  |                 |         |
| CD4 (% of CD3 <sup>+</sup> )                                 | 53.1 $\pm$ 0.8      | 56.7 $\pm$ 1.4   | 53.1 $\pm$ 2.9  | **      |
| CD4 <sup>+</sup> CD69 <sup>+</sup> (% of CD3 <sup>+</sup> )  | 2.90 $\pm$ 0.63     | 2.94 $\pm$ 0.61  | 3.59 $\pm$ 0.67 |         |
| CD8 <sup>+</sup> (% of CD3 <sup>+</sup> )                    | 35.5 $\pm$ 1.0      | 31.8 $\pm$ 2.8   | 32.2 $\pm$ 2.7  | **      |
| CD8 <sup>+</sup> CD69 <sup>+</sup> (% of CD3 <sup>+</sup> )  | 1.00 $\pm$ 0.10     | 0.79 $\pm$ 0.06  | 1.18 $\pm$ 0.16 |         |
| CD4 <sup>+</sup> IL-17 <sup>+</sup> (% of CD4 <sup>+</sup> ) | 0.49 $\pm$ 0.20     | 0.21 $\pm$ 0.11  | 0.43 $\pm$ 0.11 |         |
| CD8 <sup>+</sup> IL-17 <sup>+</sup> (% of CD8 <sup>+</sup> ) | 0.01 $\pm$ 0.03     | 0.01 $\pm$ 0.01  | 0.02 $\pm$ 0.02 |         |
| gdT cell (% of CD3 <sup>+</sup> )                            | 4.85 $\pm$ 0.58     | 4.32 $\pm$ 1.18  | 4.80 $\pm$ 0.86 |         |
| NKT cell (% of CD3 <sup>+</sup> )                            | 1.43 $\pm$ 0.19     | 1.24 $\pm$ 0.19  | 1.57 $\pm$ 0.45 |         |

|                                                              |             |             |             |               |
|--------------------------------------------------------------|-------------|-------------|-------------|---------------|
| <b>M7 I.N. NALT</b>                                          |             |             |             |               |
| CD4 (% of CD3 <sup>+</sup> )                                 | 48.3 ± 5.5  | 62.5 ± 5.6  | 42.2 ± 3.1  | ***           |
| CD4 <sup>+</sup> CD69 <sup>+</sup> (% of CD3 <sup>+</sup> )  | 7.6 ± 2.3   | 9.4 ± 1.4   | 5.7 ± 1.8   | <i>p=0.07</i> |
| CD8 <sup>+</sup> (% of CD3 <sup>+</sup> )                    | 43.5 ± 4.35 | 28.2 ± 6.5  | 49.9 ± 3.2  | ***           |
| CD8 <sup>+</sup> CD69 <sup>+</sup> (% of CD3 <sup>+</sup> )  | 2.8 ± 1.9   | 3.54 ± 0.7  | 2.0 ± 0.3   |               |
| CD4 <sup>+</sup> IL-17 <sup>+</sup> (% of CD4 <sup>+</sup> ) | 0.35 ± 0.45 | 0.18 ± 0.21 | 0.51 ± 0.69 |               |
| CD8 <sup>+</sup> IL-17 <sup>+</sup> (% of CD8 <sup>+</sup> ) | 1.05 ± 1.85 | 1.11 ± 0.64 | 0.32 ± 0.42 |               |
| gdT cell (% of CD3 <sup>+</sup> )                            | 2.87 ± 0.84 | 4.43 ± 1.8  | 1.89 ± 1.15 | *             |
| NKT cell (% of CD3 <sup>+</sup> )                            | 1.22 ± 0.38 | 1.43 ± 0.11 | 2.02 ± 0.63 | *             |
|                                                              |             |             |             |               |
| <b>M7 I.N. Spleen</b>                                        |             |             |             |               |
| CD4 (% of CD3 <sup>+</sup> )                                 | 54.4 ± 6.6  | 57.2 ± 3.6  | 48.3 ± 1.84 | ***           |
| CD4 <sup>+</sup> CD69 <sup>+</sup> (% of CD3 <sup>+</sup> )  | 3.2 ± 0.7   | 3.8 ± 0.5   | 3.5 ± 0.6   | <i>p=0.06</i> |
| CD8 <sup>+</sup> (% of CD3 <sup>+</sup> )                    | 34.13 ± 6.2 | 29.3 ± 4.2  | 33.2 ± 2.0  | ***           |
| CD8 <sup>+</sup> CD69 <sup>+</sup> (% of CD3 <sup>+</sup> )  | 2.0 ± 0.3   | 2.7 ± 0.6   | 2.1 ± 0.4   |               |
| CD4 <sup>+</sup> IL-17 <sup>+</sup> (% of CD4 <sup>+</sup> ) | 0.62 ± 0.16 | 0.47 ± 0.42 | 0.78 ± 0.31 |               |
| CD8 <sup>+</sup> IL-17 <sup>+</sup> (% of CD8 <sup>+</sup> ) | 0.37 ± 0.25 | 0.96 ± 0.73 | 0.07 ± 0.04 |               |
| gdT cell (% of CD3 <sup>+</sup> )                            | 2.49 ± 0.39 | 4.62 ± 1.44 | 2.25 ± 0.32 | **            |
| NKT cell (% of CD3 <sup>+</sup> )                            | 2.56 ± 0.07 | 4.42 ± 1.06 | 3.29 ± 0.51 | **            |

### Supplementary References

1. Paul S, Sidney J, Sette A, Peters B. TepiTool: A Pipeline for Computational Prediction of T Cell Epitope Candidates. *Curr Protoc Immunol.* 2016;114:18 9 1- 9 24.
